# Supplementary material
Source: publisher site journal article supplement (https://www.dovepress.com/article/454694)
Supplement: Supplementary file 1 [file get_supplementary_file.php]

| **Table S1 The ingredients of Yunnan Baiyao** | | | | | | |
| --- | --- | --- | --- | --- | --- | --- |
| No. | Q1 (Da) | Q3 (Da) | Molecular weight (Da) | Formula | Ionization model | Compounds |
| 1 | 279.1585 | 149.0327 | 278.1518 | C16H22O4 | [M+H]+ | Butyl isobutyl phthalate |
| 2 | 130.0900 | 84.0800 | 129.0790 | C6H11NO2 | [M+H]+ | L-Pipecolic Acid |
| 3 | 450.2900 | 432.2800 | 449.2777 | C25H39NO6 | [M+H]+ | Condelphine |
| 4 | 182.0800 | 91.0500 | 181.0739 | C9H11NO3 | [M+H]+ | N-(2-Hydroxy-4-methoxyphenyl)acetamide |
| 5 | 140.0342 | 98.9637 | 139.0269 | C6H5NO3 | [M+H]+ | 4-Nitrophenol |
| 6 | 195.0600 | 163.0400 | 194.0579 | C10H10O4 | [M+H]+ | Dimethyl phthalate |
| 7 | 577.3700 | 271.2100 | 576.3662 | C33H52O8 | [M+H]+ | 3-Epidiosgenin-3-O-glucoside |
| 8 | 427.3934 | 345.3152 | 426.3862 | C30H50O | [M+H]+ | 9,19-Cyclolanost-24-en-3-ol (Cycloartenol) |
| 9 | 136.0800 | 91.0500 | 135.0684 | C8H9NO | [M+H]+ | 2-Aminoacetophenone |
| 10 | 217.1000 | 144.0800 | 216.0899 | C12H12N2O2 | [M+H]+ | (R)-1,2,3,4-Tetrahydro-3-carboxy-2-carboline |
| 11 | 136.0700 | 91.0500 | 135.0684 | C8H9NO | [M+H]+ | N-benzylformamide |
| 12 | 364.2500 | 346.2400 | 363.2410 | C21H33NO4 | [M+H]+ | 16β-Hydroxycardiopetaline |
| 13 | 132.1000 | 69.0700 | 131.0946 | C6H13NO2 | [M+H]+ | 6-Aminocaproic acid |
| 14 | 481.3200 | 371.2200 | 480.3087 | C27H44O7 | [M+H]+ | 2,3,14,20,22,25-Hexahydroxycholest-7-en-6-one (Ecdysterone) |
| 15 | 104.1070 | 60.0808 | 104.1070 | C5H14NO+ | [M]+ | Choline |
| 16 | 1107.5900 | 1107.5900 | 1108.6029 | C54H92O23 | [M-H]- | Notoginsenoside Rb1 |
| 17 | 149.0200 | 65.0400 | 148.0160 | C8H4O3 | [M+H]+ | Phthalic anhydride |
| 18 | 146.0900 | 87.0400 | 145.0851 | C5H11N3O2 | [M+H]+ | 4-Guanidinobutyric acid |
| 19 | 517.1582 | 175.0400 | 518.1636 | C22H30O14 | [M-H]- | 6'-O-Feruloyl-D-sucrose |
| 20 | 268.1500 | 136.0600 | 267.1471 | C14H21NO4 | [M+H]+ | N-(3-hydroxy-4-methoxyphenethyl)-4-hydroxybutanamide |
| 21 | 438.2900 | 420.2800 | 437.2777 | C24H39NO6 | [M+H]+ | Neoline |
| 22 | 104.0700 | 58.0700 | 103.0633 | C4H9NO2 | [M+H]+ | 2-Aminoisobutyric acid |
| 23 | 420.2700 | 388.2500 | 420.2744 | C24H38NO5+ | [M]+ | Szechenyianine F |
| 24 | 195.0700 | 163.0400 | 194.0579 | C10H10O4 | [M+H]+ | Methyl 2,5-dihydroxycinnamate |
| 25 | 464.3000 | 432.2800 | 463.2934 | C26H41NO6 | [M+H]+ | Acoapetaludine C |
| 26 | 460.1460 | 117.9000 | 461.1533 | C19H27NO12 | [M-H]- | Anthranilate-1-O-Sophoroside |
| 27 | 142.0975 | 124.0869 | 141.0902 | C6H11N3O | [M+H]+ | Histidinol |
| 28 | 739.4200 | 577.3700 | 738.4190 | C39H62O13 | [M+H]+ | Yamogenin-diglucoside |
| 29 | 176.0900 | 134.0800 | 175.0845 | C7H13NO4 | [M+H]+ | 2-Aminoheptanedioic acid |
| 30 | 137.0600 | 91.0500 | 136.0524 | C8H8O2 | [M+H]+ | Phenylacetic acid |
| 31 | 120.0800 | 103.0500 | 119.0735 | C8H9N | [M+H]+ | N-Benzylmethylene isomethylamine |
| 32 | 144.1000 | 84.0800 | 143.0946 | C7H13NO2 | [M+H]+ | N-(4-oxopentyl)-acetamide |
| 33 | 829.5000 | 769.4800 | 830.5028 | C43H74O15 | [M-H]- | Ginsenoside ST-3 |
| 34 | 406.3100 | 374.2700 | 405.2879 | C24H39NO4 | [M+H]+ | 8-O-Methylsachaconitine |
| 35 | 407.1336 | 227.0728 | 408.1420 | C20H24O9 | [M-H]- | Nodakenin |
| 36 | 378.2600 | 360.2500 | 377.2566 | C22H35NO4 | [M+H]+ | Karakoline |
| 37 | 315.1091 | 153.0558 | 316.1158 | C14H20O8 | [M-H]- | 5-(2-Hydroxyethyl)-2-O-glucosylphenol |
| 38 | 406.2600 | 374.2300 | 405.2515 | C23H35NO5 | [M+H]+ | Nevadenine |
| 39 | 281.1500 | 177.0500 | 280.1423 | C14H20N2O4 | [M+H]+ | N-Feruloylhydroxyputrescine |
| 40 | 330.1700 | 192.1000 | 329.1627 | C19H23NO4 | [M+H]+ | Tetrahydroprotopapaverine |
| 41 | 279.1577 | 149.0226 | 278.1518 | C16H22O4 | [M+H]+ | Dibutyl phthalate |
| 42 | 163.0400 | 77.0400 | 162.0252 | C8H6N2S | [M+H]+ | 4-Phenyl-1,2,3-thiadiazole |
| 43 | 128.0300 | 93.0600 | 127.0189 | C6H6ClN | [M+H]+ | 3-Chloroaniline |
| 44 | 360.2537 | 342.2520 | 359.2460 | C22H33NO3 | [M+H]+ | 12-Epinapelline |
| 45 | 360.2500 | 342.2500 | 359.2460 | C22H33NO3 | [M+H]+ | Lepenine |
| 46 | 376.2500 | 358.2400 | 375.2410 | C22H33NO4 | [M+H]+ | Turupellin |
| 47 | 86.0964 | 69.0698 | 85.0891 | C5H11N | [M+H]+ | Piperidine |
| 48 | 247.0908 | 229.0857 | 246.0892 | C14H14O4 | [M+H]+ | Decursinol |
| 49 | 379.2106 | 335.2221 | 380.2199 | C21H32O6 | [M-H]- | Ajugalide D |
| 50 | 279.1591 | 149.0233 | 278.1518 | C16H22O4 | [M+H]+ | Diisobutyl phthalate |
| 51 | 402.2629 | 370.2400 | 401.2566 | C24H35NO4 | [M+H]+ | Aconitramine A |
| 52 | 558.3100 | 540.2900 | 557.2989 | C31H43NO8 | [M+H]+ | Hemsleyaconitine D |
| 53 | 468.2900 | 418.2600 | 467.2883 | C25H41NO7 | [M+H]+ | Delsoline |
| 54 | 360.2500 | 342.2500 | 359.2460 | C22H33NO3 | [M+H]+ | Napelline |
| 55 | 138.0788 | 94.0651 | 137.0715 | C7H9N2O | [M+H]+ | 3-Carbamyl-1-methylpyridinium;(1-Methylnicotinamide) |
| 56 | 272.1200 | 107.0500 | 271.1208 | C16H17NO3 | [M+H]+ | Higenamine |
| 57 | 203.0300 | 147.0400 | 202.0266 | C11H6O4 | [M+H]+ | Bergaptol |
| 58 | 314.1800 | 269.1200 | 314.1751 | C19H24NO3+ | [M]+ | Magnocurarine |
| 59 | 163.0754 | 91.0542 | 162.0681 | C10H10O2 | [M+H]+ | 4-MethoxycinnaMaldehyde |
| 60 | 325.0900 | 163.0400 | 326.1002 | C15H18O8 | [M-H]- | 1-O-p-Coumaroyl-β-D-glucose |
| 61 | 394.2600 | 376.2500 | 393.2515 | C22H35NO5 | [M+H]+ | Columbianine |
| 62 | 220.1000 | 137.0600 | 219.0830 | C11H13N3S | [M+H]+ | 3-(1-Piperazinyl)-1,2-benzisothiazole |
| 63 | 170.1535 | 152.1437 | 169.1467 | C10H19NO | [M+H]+ | 2-Ethyl-2,6,6-trimethylpiperidin-4-one |
| 64 | 474.1732 | 327.1201 | 473.1659 | C20H23N7O7 | [M+H]+ | 10-Formyltetrahydrofolic Acid |
| 65 | 203.0800 | 157.0400 | 202.0742 | C11H10N2O2 | [M+H]+ | Vasicinone |
| 66 | 355.1000 | 193.0500 | 356.1107 | C16H20O9 | [M-H]- | Ferulic β-glucoside |
| 67 | 149.0597 | 103.0566 | 148.0524 | C9H8O2 | [M+H]+ | Cinnamic acid |
| 68 | 267.1700 | 179.0700 | 266.1630 | C14H22N2O3 | [M+H]+ | Dihydroferuloylputrescine |
| 69 | 118.0700 | 91.0500 | 117.0578 | C8H7N | [M+H]+ | Indole |
| 70 | 183.0800 | 98.9800 | 182.0732 | C13H10O | [M+H]+ | 9-Fluorenol |
| 71 | 159.0900 | 132.0800 | 158.0844 | C10H10N2 | [M+H]+ | 1,5-Naphthalenediamine |
| 72 | 112.0869 | 95.0604 | 111.0796 | C5H9N3 | [M+H]+ | Histamine |
| 73 | 372.2500 | 340.2300 | 371.2460 | C23H33NO3 | [M+H]+ | Vilmoraconitine |
| 74 | 153.0505 | 65.0376 | 152.0473 | C8H8O3 | [M+H]+ | Isovanillin |
| 75 | 841.5000 | 781.4800 | 842.5028 | C44H74O15 | [M-H]- | Vina-Ginsenoside R1 |
| 76 | 585.3190 | 567.3074 | 584.3098 | C32H44N2O8 | [M+H]+ | Lannaconitine |
| 77 | 144.0800 | 84.0600 | 143.0695 | C5H9N3O2 | [M+H]+ | 2-Amino-4,5-dihydro-1H-imidazole-4-acetic acid |
| 78 | 188.0700 | 118.0700 | 187.0633 | C11H9NO2 | [M+H]+ | 3-Indoleacrylic acid |
| 79 | 363.2500 | 281.2500 | 364.2614 | C22H36O4 | [M-H]- | Ajugalaevigatic acid |
| 80 | 94.0651 | 53.0383 | 93.0578 | C6H7N | [M+H]+ | 2-Picoline; 2-Methylpyridine |
| 81 | 188.0700 | 118.0600 | 187.0633 | C11H9O2N | [M+H]+ | 3-amino-2-naphthoic acid |
| 82 | 206.0812 | 145.0522 | 205.0739 | C11H11NO3 | [M+H]+ | Methoxyindoleacetic acid |
| 83 | 1123.5900 | 1123.5900 | 1124.5979 | C54H92O24 | [M-H]- | Notoginsenoside A |
| 84 | 327.2073 | 309.1973 | 326.1994 | C20H26N2O2 | [M+H]+ | Hydroquinine |
| 85 | 163.0400 | 119.0500 | 164.0473 | C9H8O3 | [M-H]- | 2-Hydroxycinnamic acid |
| 86 | 163.0400 | 119.0500 | 164.0473 | C9H8O3 | [M-H]- | α-Hydroxycinnamic Acid |
| 87 | 163.0448 | 119.0539 | 164.0473 | C9H8O3 | [M-H]- | 3-Hydroxycinnamic Acid |
| 88 | 484.2900 | 434.2500 | 483.2832 | C25H41NO8 | [M+H]+ | Pseudoaconine |
| 89 | 72.0808 | 55.0541 | 71.0735 | C4H9N | [M+H]+ | Pyrrolidin |
| 90 | 353.0900 | 191.0600 | 354.0951 | C16H18O9 | [M-H]- | Cryptochlorogenic acid (4-O-Caffeoylquinic acid) |
| 91 | 96.0444 | 68.0495 | 95.0371 | C5H5NO | [M+H]+ | 3-Hydroxypyridine |
| 92 | 243.0877 | 145.0761 | 242.0804 | C12H10N4O2 | [M+H]+ | Lumichrome |
| 93 | 353.0900 | 191.0600 | 354.0951 | C16H18O9 | [M-H]- | Neochlorogenic acid (5-O-Caffeoylquinic acid) |
| 94 | 353.0900 | 191.0600 | 354.0951 | C16H18O9 | [M-H]- | Chlorogenic acid (3-O-Caffeoylquinic acid) |
| 95 | 203.2230 | 84.0810 | 202.2157 | C10H26N4 | [M+H]+ | Spermine |
| 96 | 193.0506 | 134.0373 | 194.0579 | C10H10O4 | [M-H]- | Ferulic acid* |
| 97 | 193.0506 | 134.0374 | 194.0579 | C10H10O4 | [M-H]- | Isoferulic Acid* |
| 98 | 130.0600 | 103.0500 | 129.0578 | C9H7N | [M+H]+ | Isoquinoline |
| 99 | 164.0353 | 120.0454 | 165.0426 | C8H7NO3 | [M-H]- | 2-(Formylamino)benzoic acid |
| 100 | 595.1657 | 457.1341 | 594.1585 | C27H30O15 | [M+H]+ | Apigenin-6,8-di-C-glucoside (Vicenin-2) |
| 101 | 181.0500 | 135.0400 | 182.0579 | C9H10O4 | [M-H]- | (S)-2-Hydroxy-3-(4-Hydroxyphenyl)Propanoic Acid |
| 102 | 282.2800 | 69.0700 | 281.2719 | C18H35NO | [M+H]+ | Octadec-8-enamide |
| 103 | 205.1000 | 146.0600 | 204.0899 | C11H12N2O2 | [M+H]+ | 1-Methoxy-indole-3-acetamide |
| 104 | 438.2800 | 406.2600 | 437.2777 | C24H39NO6 | [M+H]+ | Subcusine |
| 105 | 181.0500 | 135.0400 | 182.0579 | C9H10O4 | [M-H]- | 4-Hydroxyphenyllactic Acid |
| 106 | 181.0500 | 135.0400 | 182.0579 | C9H10O4 | [M-H]- | Methyl 2,4-dihydroxyphenylacetate |
| 107 | 497.3100 | 443.2800 | 496.3036 | C27H44O8 | [M+H]+ | 2,3,5,14,20,22,25-Heptahydroxycholest-7-en-6-one (Polypodine b) |
| 108 | 385.1129 | 223.0601 | 384.1056 | C17H20O10 | [M+H]+ | Isofraxidin-7-O-glucoside |
| 109 | 203.1430 | 129.0694 | 202.1358 | C14H18O | [M+H]+ | 2-Pentyl-3-phenyl-2-propenal |
| 110 | 632.3082 | 572.2883 | 631.2993 | C33H45NO11 | [M+H]+ | Mesaconitine |
| 111 | 168.0700 | 105.0300 | 167.0582 | C8H9NO3 | [M+H]+ | 4,5,6-Trihydroxy-2-cyclohexen-1-ylideneacetonitrile |
| 112 | 205.1598 | 189.1267 | 206.1671 | C14H22O | [M-H]- | 2,4-Di-Tert-Butylphenol |
| 113 | 811.4900 | 751.4700 | 812.4922 | C43H72O14 | [M-H]- | Sanchirhinoside A2 |
| 114 | 579.1719 | 271.0606 | 580.1792 | C27H32O14 | [M-H]- | Naringenin-7-O-Rutinoside(Narirutin) |
| 115 | 205.1600 | 189.1300 | 206.1671 | C14H22O | [M-H]- | 2,6-Di-tert-butylphenol |
| 116 | 579.1719 | 271.0622 | 580.1792 | C27H32O14 | [M-H]- | Naringenin-7-O-Neohesperidoside(Naringin)* |
| 117 | 168.0649 | 94.0645 | 167.0582 | C8H9NO3 | [M+H]+ | 2-Amino-3-methoxybenzoic acid |
| 118 | 131.0500 | 70.0300 | 132.0535 | C4H8N2O3 | [M-H]- | 3-Ureidopropionic Acid |
| 119 | 646.3226 | 586.2978 | 645.3149 | C34H47NO11 | [M+H]+ | Aconitine |
| 120 | 301.2200 | 301.2200 | 302.2246 | C20H30O2 | [M-H]- | Kaurenoic Acid |
| 121 | 146.0600 | 91.0542 | 145.0528 | C9H7NO | [M+H]+ | Indole-3-carboxaldehyde |
| 122 | 144.1000 | 58.0600 | 143.0946 | C7H13NO2 | [M+H]+ | Stachydrine |
| 123 | 301.2200 | 301.2200 | 302.2246 | C20H30O2 | [M-H]- | Pimaric acid |
| 124 | 159.0509 | 72.0802 | 158.0440 | C4H6N4O3 | [M+H]+ | Allantoin |
| 125 | 280.2600 | 81.0700 | 279.2562 | C18H33NO | [M+H]+ | octadecadienoic acid amide |
| 126 | 165.0899 | 91.0536 | 164.0837 | C10H12O2 | [M+H]+ | Ethyl phenylacetate |
| 127 | 385.1100 | 223.0600 | 386.1213 | C17H22O10 | [M-H]- | 1-O-Sinapoyl-β-D-glucose |
| 128 | 358.2362 | 330.2000 | 357.2304 | C22H31NO3 | [M+H]+ | Dehydronapelline |
| 129 | 153.1274 | 107.0855 | 152.1201 | C10H16O | [M+H]+ | Perillyl alcohol |
| 130 | 133.0649 | 77.0383 | 132.0575 | C9H8O | [M+H]+ | 1-Indanone |
| 131 | 439.2184 | 277.1664 | 438.2114 | C20H30O7N4 | [M+H]+ | N'-p-Coumaroylagmatine-glucoside |
| 132 | 195.1400 | 138.0700 | 196.1463 | C12H20O2 | [M-H]- | Linalyl Acetate |
| 133 | 753.4800 | 423.3600 | 752.4711 | C41H68O12 | [M+H]+ | Notoginsenoside T5 |
| 134 | 377.2300 | 295.2300 | 378.2406 | C22H34O5 | [M-H]- | Vitexilactone |
| 135 | 239.2000 | 105.0700 | 238.1933 | C15H26O2 | [M+H]+ | 1β,6α-Dihydroxy-4(14)-eudesmene |
| 136 | 167.9931 | 135.0135 | 166.9863 | C7H5NS2 | [M+H]+ | 2-Mercaptobenzothiazole |
| 137 | 145.1335 | 86.0961 | 144.1263 | C7H16N2O | [M+H]+ | N-Acetylcadaverine |
| 138 | 574.3012 | 542.2772 | 573.2938 | C31H43NO9 | [M+H]+ | Benzoylhypaconine |
| 139 | 256.2600 | 102.0900 | 255.2562 | C16H33NO | [M+H]+ | palmitic amide |
| 140 | 190.0900 | 118.0700 | 189.0790 | C11H11NO2 | [M+H]+ | 3-Indolepropionic acid |
| 141 | 89.1073 | 72.0808 | 88.1000 | C4H12N2 | [M+H]+ | Putrescine |
| 142 | 165.0600 | 103.0600 | 166.0630 | C9H10O3 | [M-H]- | 2-Hydroxy-3-phenylpropanoic acid |
| 143 | 165.0600 | 119.0500 | 166.0630 | C9H10O3 | [M-H]- | 3-(4-Hydroxyphenyl)-propionic acid |
| 144 | 139.0754 | 77.0379 | 138.0681 | C8H10O2 | [M+H]+ | 2-Methoxy-4-methylphenol |
| 145 | 126.1000 | 68.0500 | 125.0953 | C6H11N3 | [M+H]+ | 1-Methylhistamine |
| 146 | 157.0760 | 130.0651 | 156.0687 | C10H8N2 | [M+H]+ | 3-Indoleacetonitrile |
| 147 | 165.0600 | 119.0500 | 166.0630 | C9H10O3 | [M-H]- | 2,6-Dimethoxybenzaldehyde |
| 148 | 301.2200 | 301.2200 | 302.2246 | C20H30O2 | [M-H]- | Abietic acid |
| 149 | 122.0600 | 105.0335 | 121.0528 | C7H7NO | [M+H]+ | Benzamide |
| 150 | 227.0917 | 181.0493 | 226.0836 | C11H14O5 | [M+H]+ | 3,4'-Dihydroxy-3',5'-dimethoxypropiophenone |
| 151 | 425.2071 | 177.0546 | 424.1998 | C24H28N2O5 | [M+H]+ | p-Coumaroylferuloylcadaverine |
| 152 | 165.0534 | 119.0508 | 164.0473 | C9H8O3 | [M+H]+ | 4-hydroxyphenyl acrylaldehyde |
| 153 | 206.1387 | 76.0757 | 205.1314 | C9H19NO4 | [M+H]+ | D-Panthenol |
| 154 | 146.1652 | 72.0808 | 145.1579 | C7H19N3 | [M+H]+ | Spermidine |
| 155 | 193.0459 | 147.0439 | 192.0423 | C10H8O4 | [M+H]+ | 6,7-Dihydroxy-4-methylcoumarin |
| 156 | 579.1345 | 283.0600 | 578.1272 | C26H26O15 | [M+H]+ | Apigenin-6-C-(2''-glucuronyl)xyloside |
| 157 | 637.4300 | 421.3500 | 636.4237 | C36H60O9 | [M+H]+ | ginsenoside Rh5/7/8 |
| 158 | 219.1128 | 160.0757 | 218.1055 | C12H14N2O2 | [M+H]+ | N-Acetyl-5-hydroxytryptamine |
| 159 | 114.0550 | 70.0285 | 149.0244 | C5H8ClNO2 | [M-Cl]+ | 3-Chloro-4-hydroxypiperidin-2-one |
| 160 | 116.0466 | 74.0248 | 117.0538 | C3H7N3O2 | [M-H]- | Guanidinoacetate |
| 161 | 166.0190 | 79.9572 | 167.0219 | C7H5NO4 | [M-H]- | Quinolinic Acid |
| 162 | 102.1277 | 58.0683 | 101.1204 | C6H15N | [M+H]+ | Triethylamine |
| 163 | 447.0900 | 271.0600 | 446.0849 | C21H18O11 | [M+H]+ | Baicalin |
| 164 | 507.3304 | 447.3099 | 506.3244 | C29H46O7 | [M+H]+ | 2,3,14,20,22,27-Hexahydroxystigmasta-7,25-dien-6-one (Ajugasterone B) |
| 165 | 627.3700 | 429.3000 | 626.3666 | C33H54O11 | [M+H]+ | Ecdysone-25-O-Glucoside |
| 166 | 451.2682 | 433.2224 | 450.2618 | C25H38O7 | [M+H]+ | Ajugacumbin F |
| 167 | 565.1552 | 367.1000 | 564.1479 | C26H28O14 | [M+H]+ | Isovitexin-8-O-xyloside |
| 168 | 435.0922 | 303.0606 | 434.0849 | C20H18O11 | [M+H]+ | Quercetin-3-O-xyloside (Reynoutrin) |
| 169 | 435.0909 | 303.0582 | 434.0849 | C20H18O11 | [M+H]+ | Avicularin(Quercetin-3-O-α-L-arabinofuranoside) |
| 170 | 595.1658 | 287.0584 | 594.1585 | C27H30O15 | [M+H]+ | Luteolin-7-O-neohesperidoside (Lonicerin) |
| 171 | 595.1660 | 287.0598 | 594.1585 | C27H30O15 | [M+H]+ | Kaempferol-3-O-glucorhamnoside |
| 172 | 595.1657 | 287.0567 | 594.1585 | C27H30O15 | [M+H]+ | Kaempferol-3-O-glucoside-7-O-rhamnoside |
| 173 | 122.1000 | 105.0700 | 121.0891 | C8H11N | [M+H]+ | 2-Phenylethylamine |
| 174 | 148.0757 | 103.0554 | 147.0684 | C9H9NO | [M+H]+ | (E)-Cinnamamide |
| 175 | 579.1691 | 271.0697 | 578.1636 | C27H30O14 | [M+H]+ | Apigenin-7-O-neohesperidoside (Rhoifolin) |
| 176 | 74.0964 | 57.0690 | 73.0891 | C4H11N | [M+H]+ | Butylamine |
| 177 | 579.1497 | 271.0609 | 578.1424 | C30H26O12 | [M+H]+ | Apigenin-7-O-(6''-p-Coumaryl)glucoside |
| 178 | 176.0706 | 130.0651 | 175.0633 | C10H9NO2 | [M+H]+ | Indole-3-acetic acid (IAA) |
| 179 | 291.0863 | 123.0441 | 290.0790 | C15H14O6 | [M+H]+ | 3-Hydroxyphloretin |
| 180 | 551.1395 | 497.1000 | 550.1323 | C25H26O14 | [M+H]+ | Luteolin-6,8-di-C-arabinoside |
| 181 | 255.0652 | 181.0638 | 254.0579 | C15H10O4 | [M+H]+ | 3,4'-Dihydroxyflavone |
| 182 | 581.1501 | 383.2000 | 580.1428 | C26H28O15 | [M+H]+ | Luteolin-7-O-glucoside-5-O-arabinoside |
| 183 | 361.2000 | 279.1900 | 362.2093 | C21H30O5 | [M-H]- | Humulone |
| 184 | 183.0652 | 140.0466 | 182.0579 | C9H10O4 | [M+H]+ | Syringaldehyde; 4-Hydroxy-3,5-Dimethoxybenzaldehyde |
| 185 | 206.0817 | 118.0693 | 205.0739 | C11H11NO3 | [M+H]+ | 2-(Acetylamino)-3-phenyl-2-propenoic acid |
| 186 | 609.1814 | 301.0726 | 608.1741 | C28H32O15 | [M+H]+ | Diosmetin-7-O-Neohesperidoside (Neodiosmin) |
| 187 | 609.1814 | 301.0726 | 608.1741 | C28H32O15 | [M+H]+ | Diosmetin-7-O-rutinoside (Diosmin) |
| 188 | 183.0700 | 137.0600 | 182.0579 | C9H10O4 | [M+H]+ | 2',4'-Dihydroxy-6'-methoxyacetophenone |
| 189 | 453.3389 | 371.2546 | 454.3447 | C30H46O3 | [M-H]- | 3-Oxolanosta-8,24-dien-21-oic acid (Beta-Elemonic acid) |
| 190 | 195.0915 | 178.0655 | 194.0844 | C13H10N2 | [M+H]+ | 9-Aminoacridine |
| 191 | 419.0973 | 287.0539 | 418.0900 | C20H18O10 | [M+H]+ | Kaempferol-3-O-arabinoside |
| 192 | 179.0718 | 92.0265 | 180.0786 | C10H12O3 | [M-H]- | Propyl 4-hydroxybenzoate |
| 193 | 255.0653 | 181.0663 | 254.0579 | C15H10O4 | [M+H]+ | 7,8-Dihydroxy-4-phenylcoumarin |
| 194 | 204.0700 | 158.0600 | 205.0739 | C11H11NO3 | [M-H]- | Indole-3-lactic acid |
| 195 | 400.3400 | 85.0300 | 399.3349 | C23H45NO4 | [M+H]+ | L-Palmitoylcarnitine |
| 196 | 535.1100 | 287.0500 | 534.1010 | C24H22O14 | [M+H]+ | Kaempferol-3-O-(6''-malonyl)galactoside |
| 197 | 535.1100 | 287.0500 | 534.1010 | C24H22O14 | [M+H]+ | Kaempferol-3-O-(6''-malonyl)glucoside |
| 198 | 143.0500 | 115.0500 | 144.0575 | C10H8O | [M-H]- | 2-Naphthol |
| 199 | 143.0500 | 115.0600 | 144.0575 | C10H8O | [M-H]- | 1-Naphthol |
| 200 | 344.2800 | 85.0300 | 343.2723 | C19H37NO4 | [M+H]+ | Dodecylcarnitine |
| 201 | 336.1200 | 320.0900 | 336.1230 | C20H18NO4+ | [M]+ | Epiberberine |
| 202 | 251.1700 | 191.1400 | 252.1725 | C15H24O3 | [M-H]- | Ilicic acid |
| 203 | 445.0800 | 269.0500 | 446.0849 | C21H18O11 | [M-H]- | Apigenin-7-O-glucuronide |
| 204 | 212.0200 | 168.0000 | 211.0126 | C9H9NOS2 | [M+H]+ | 2-(2-Benzothiazolylthio)ethanol |
| 205 | 76.0757 | 58.0723 | 75.0684 | C3H9NO | [M+H]+ | 1-Aminopropan-2-ol |
| 206 | 76.0757 | 58.0723 | 75.0684 | C3H9NO | [M+H]+ | Trimethylamine N-Oxide |
| 207 | 160.0404 | 116.0506 | 161.0477 | C9H7NO2 | [M-H]- | Indole-5-carboxylic acid |
| 208 | 160.0404 | 116.0506 | 161.0477 | C9H7NO2 | [M-H]- | Indole-3-carboxylic acid |
| 209 | 140.0118 | 78.9591 | 141.0191 | C2H8NO4P | [M-H]- | O-Phosphorylethanolamine |
| 210 | 204.1300 | 85.0300 | 203.1158 | C9H17NO4 | [M+H]+ | O-Acetyl-L-carnitine |
| 211 | 933.5400 | 295.1000 | 932.5345 | C47H80O18 | [M+H]+ | ginsenoside Re4 |
| 212 | 933.5400 | 295.1000 | 932.5345 | C47H80O18 | [M+H]+ | Notoginsenoside R1 |
| 213 | 225.0910 | 131.0521 | 224.0837 | C15H12O2 | [M+H]+ | 4'-Hydroxychalcone |
| 214 | 431.3200 | 377.2800 | 430.3083 | C27H42O4 | [M+H]+ | Hecogenin |

Q1 (Da): The molecular weight of the parent ion after ionization by electrospray ionization source；Q3 (Da): characteristic fragment ions


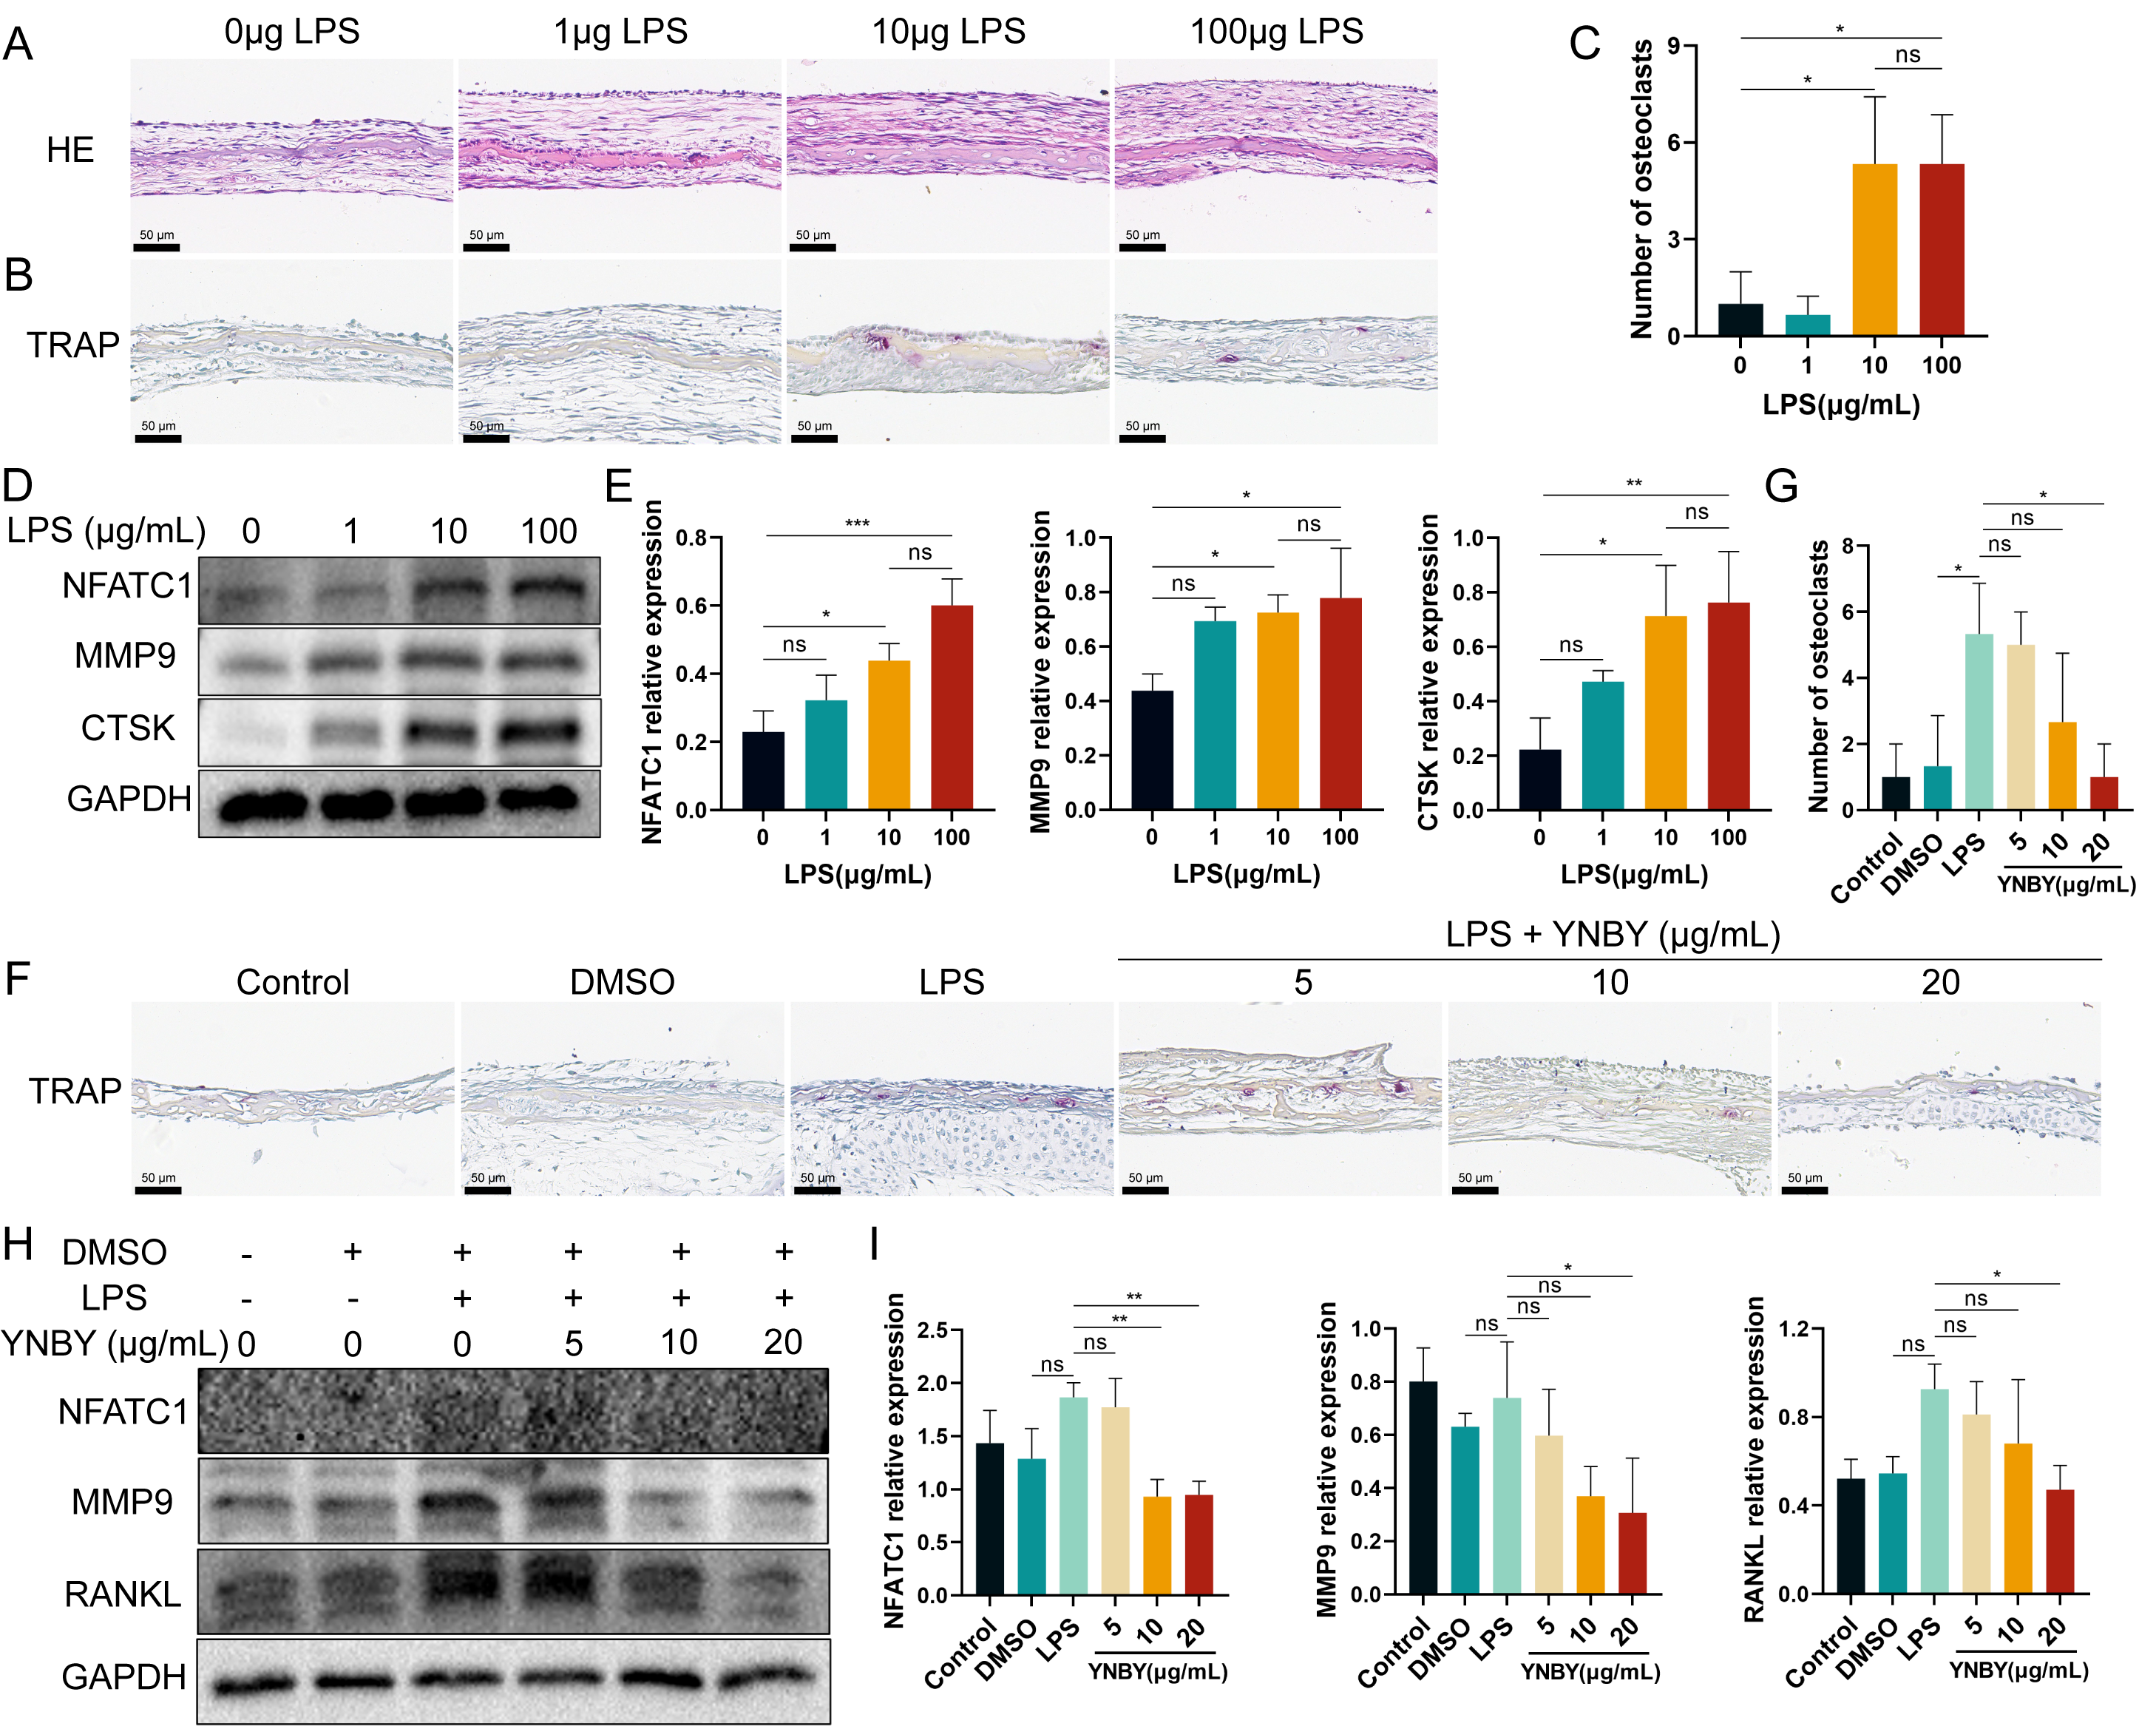


**Figure S1 YNBY inhibits osteoclast differentiation in an inflammatory environment.** (A-C) Representative H&E (A) and TRAP staining (B) of calvaria treated with different concentrations of LPS and quantitative analysis of osteoclast number (C); scale bar, 50 μm. (D-E) Western blot (D) and quantification (E) of NFATC1, MMP9 and CTSK in calvaria treated with different concentrations of LPS. (F-G) TRAP staining of calvaria intervened by LPS and different concentrations of YNBY (F) and quantitative analysis of osteoclast number (G); scale bar, 50 μm. (H-I) Western blot (H) and quantification (I) of NFATC1, MMP9 and RANKL in calvaria treated with LPS and different concentrations of YNBY. Data are expressed as the mean ± SD; n=3; *p < .05; **p < .01; ***p < .001.


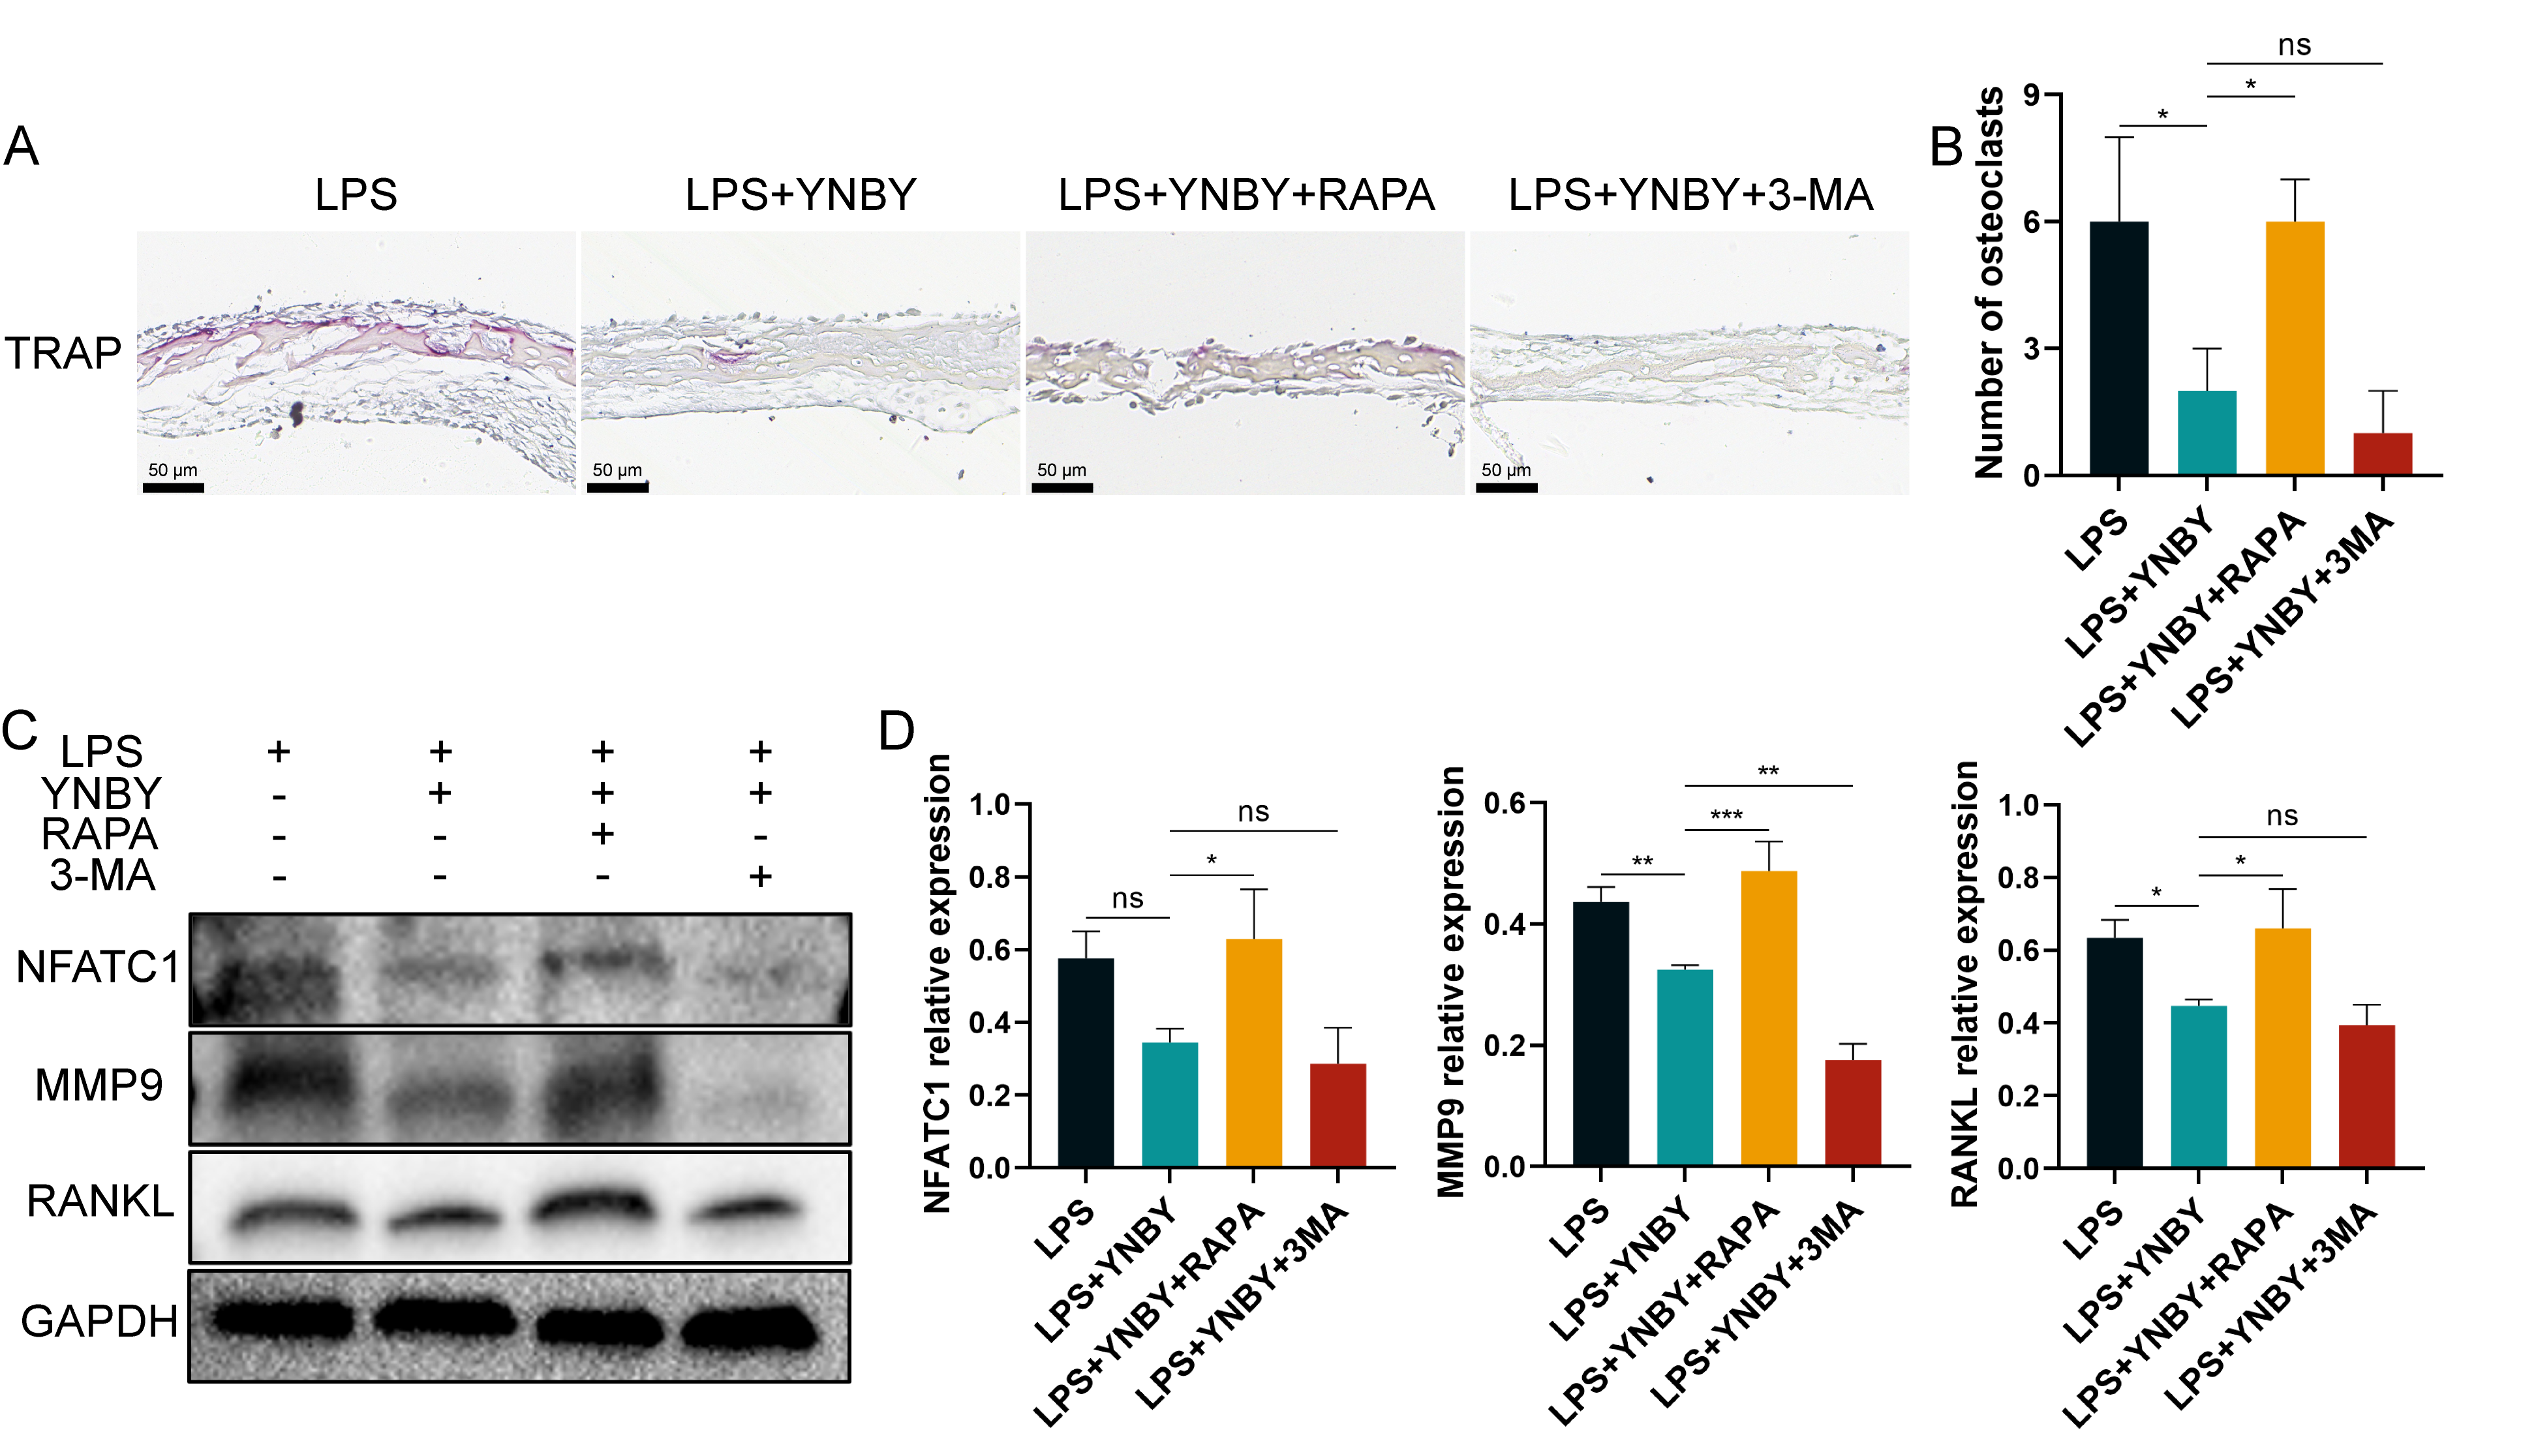


**Figure S2 YNBY inhibits osteoclast differentiation by inhibiting inflammation-induced autophagy.** (A-B) TRAP staining of calvaria (A) and quantitative analysis of osteoclast number (B); scale bar, 50 μm. (C-D) Western blot (C) and quantificational analysis (D) of NFATC1, MMP9 and RANKL in calvaria. Data are expressed as the mean ± SD; n=3; *p < .05; **p < .01; ***p < .001.
